# Supplementary material for: Quantitative Analysis of Cell Aggregation Dynamics Identifies HDAC Inhibitors as Potential Regulators of Cancer Cell Clustering
Source: MDPI journal article supplement (doi:10.3390/cancers13225840), 2021-11-21
Supplement: s1 [file s1]

A

## AUC and area-2h

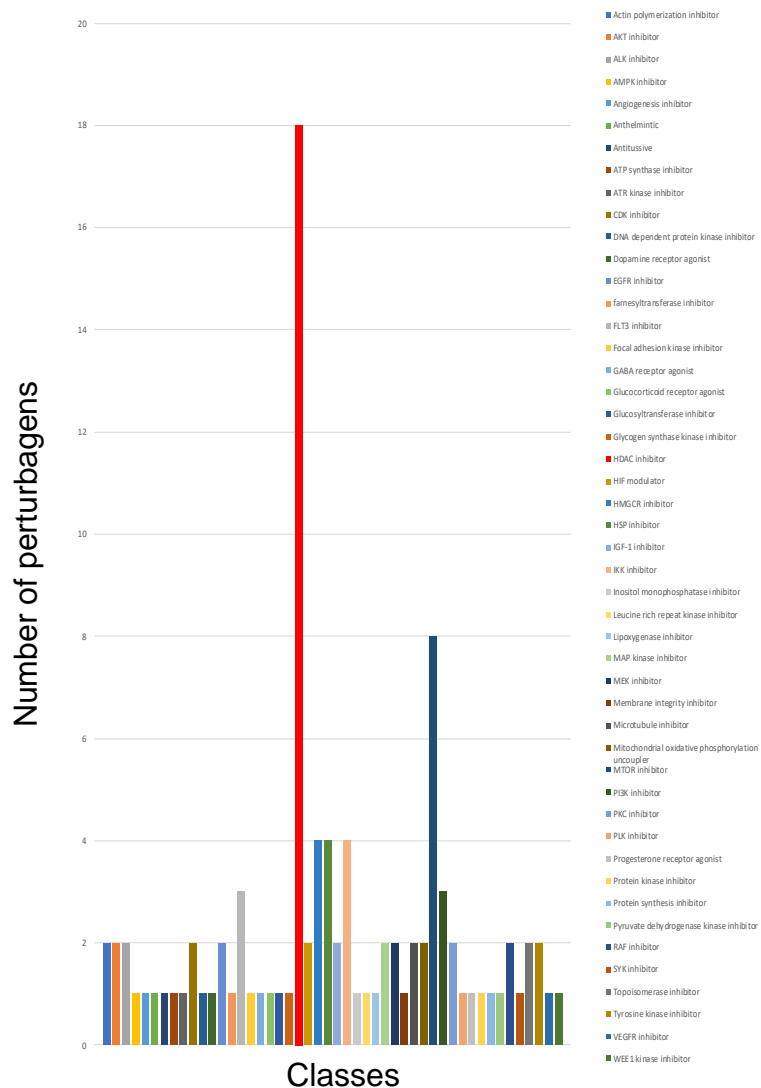

B

## Circularity

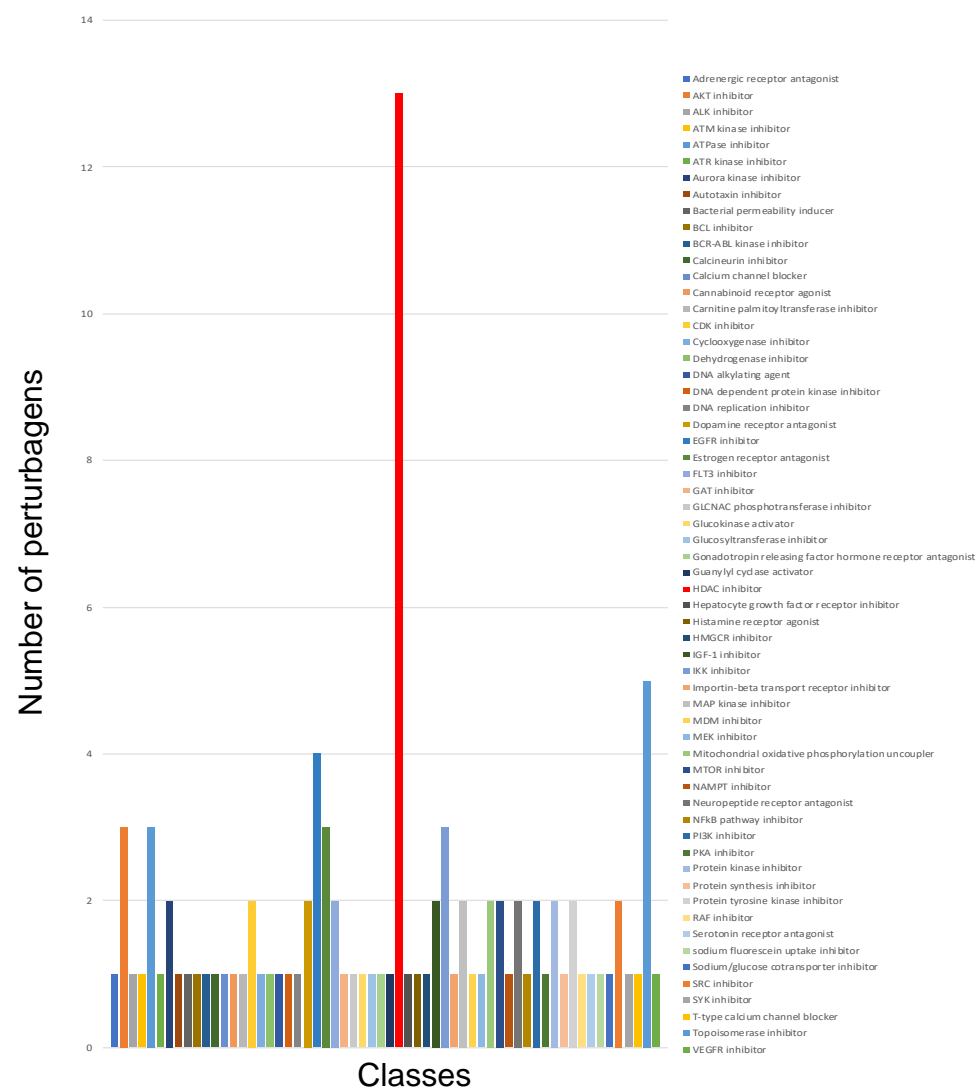

**Supplementary Figure S2: Distribution of perturbagens with the 100 top scores according to their class.**

Each graph corresponds to the number of compounds, with the 100 top scores, in each indicated class for the results obtained with the gene expression signatures for AUC and area-2h (A) and for circularity (B). In both cases, HDCA inhibitors (red) are the most represented class.
