# Supplementary material for: Quantitative Analysis of Cell Aggregation Dynamics Identifies HDAC Inhibitors as Potential Regulators of Cancer Cell Clustering
Source: MDPI journal article supplement (doi:10.3390/cancers13225840), 2021-11-21
Supplement: s1 [file s1]

| Cell lines  | Origin   | Source         | Culture media        |
|-------------|----------|----------------|----------------------|
| 59M         | Ovarian  | ECACC          | DMEM, 20IU/I insulin |
| COV318      | Ovarian  | ECACC          | DMEM                 |
| COV362      | Ovarian  | ECACC          | DMEM                 |
| COV434      | Ovarian  | ECACC          | DMEM                 |
| KURAMOCHI   | Ovarian  | JCRB cell bank | RPMI1640             |
| OAW28       | Ovarian  | ECACC          | DMEM, 20IU/I insulin |
| OVCAR3      | Ovarian  | ATCC           | RPMI1640             |
| A549        | Lung     | ATCC           | RPMI1640             |
| H23         | Lung     | ATCC           | RPMI1640             |
| H226        | Lung     | ATCC           | RPMI1640             |
| H460        | Lung     | ATCC           | RPMI1640             |
| H522        | Lung     | ATCC           | RPMI1640             |
| COLO205     | Colon    | ATCC           | RPMI1640             |
| DLD1        | Colon    | ATCC           | RPMI1640             |
| HCT116      | Colon    | ATCC           | DMEM                 |
| HT29        | Colon    | ATCC           | DMEM                 |
| SW620       | Colon    | ATCC           | RPMI1640             |
| BT-549      | Breast   | ATCC           | RPMI1640             |
| HS-578T     | Breast   | ATCC           | DMEM                 |
| MCF-7 ATCC  | Breast   | ATCC           | RPMI1640             |
| MCF-7 ECACC | Breast   | ECACC          | DMEM                 |
| MDA-MB-231  | Breast   | ATCC           | DMEM                 |
| MDA-MB-436  | Breast   | ATCC           | DMEM                 |
| T47-D       | Breast   | ATCC           | RPMI1640             |
| LNCaP-FCG   | Prostate | ATCC           | RPMI1640             |

**Supplementary Table S1. List of the cell lines used in this study**

The name of the 25 cell lines, tissue of origin, their commercial source, and culture medium are indicated.
