# Supplementary material for: Quantitative Analysis of Cell Aggregation Dynamics Identifies HDAC Inhibitors as Potential Regulators of Cancer Cell Clustering
Source: MDPI journal article supplement (doi:10.3390/cancers13225840), 2021-11-21
Supplement: s1 [file s1]

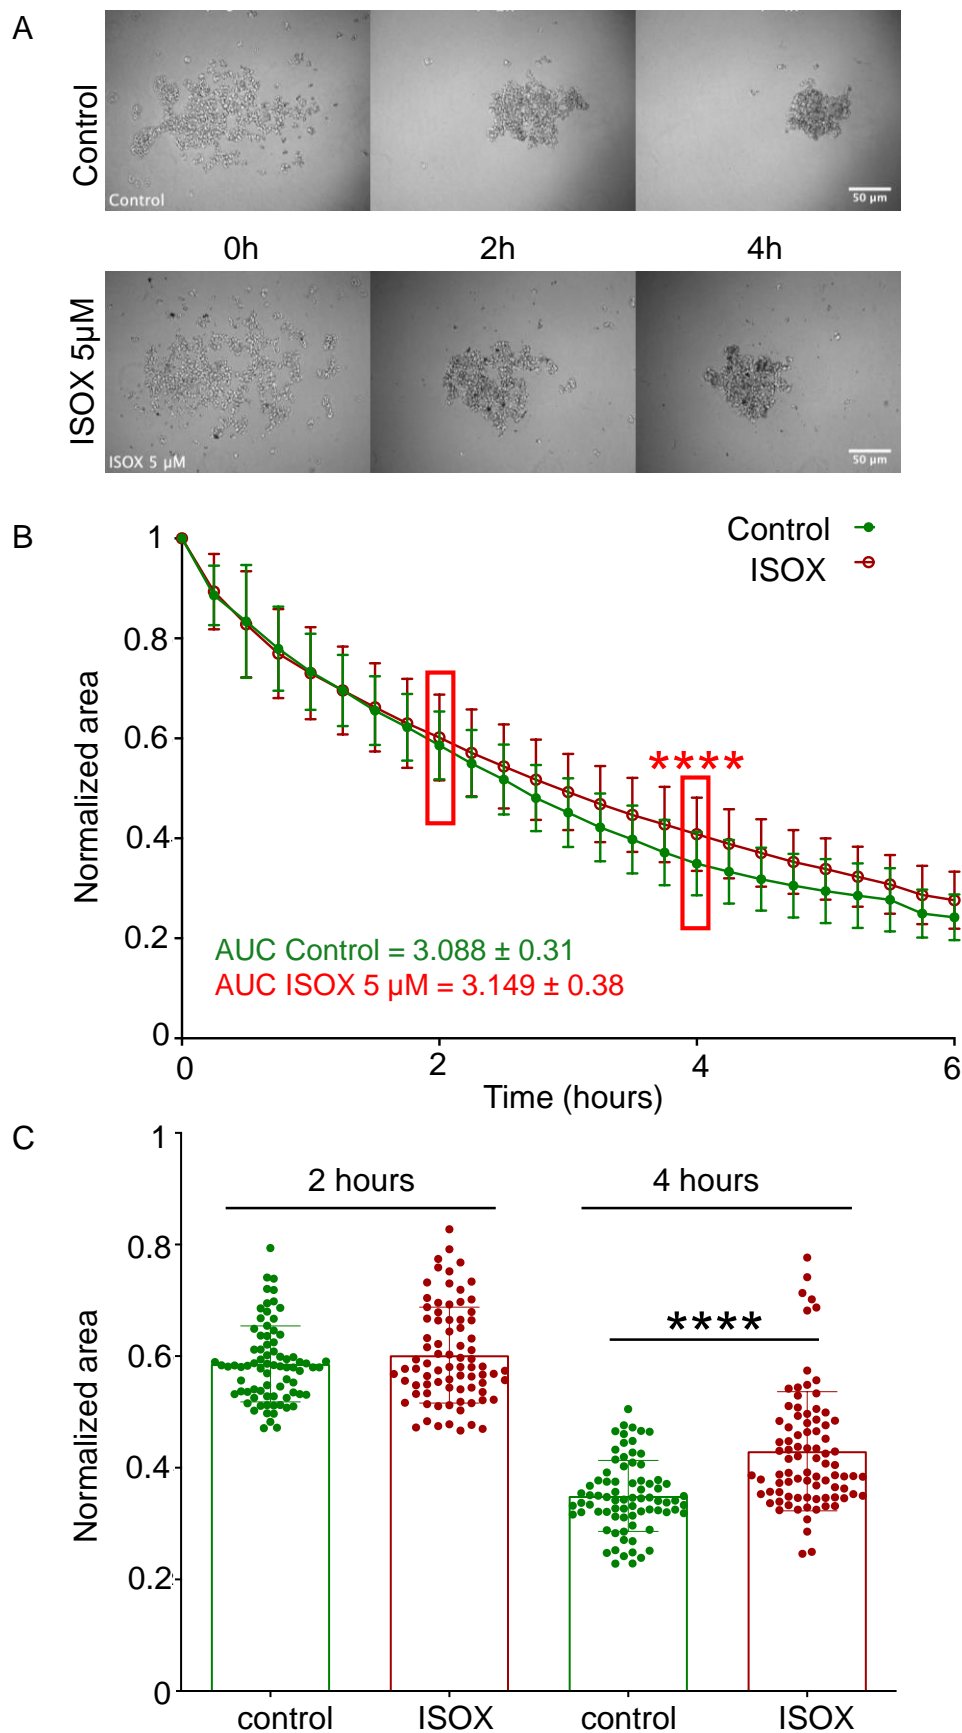

**Supplementary Figure S3. ISOX impairs the early steps of cell clustering.**

(A) Aggregation assay (T=0, 2 hours and 4 hours) in MCF-7 cells in the presence or not (control) of the HDCA inhibitor ISOX (5µM) and after 8 hours of pre-incubation or not (control). (B) Normalized area of cell aggregates in the presence or not of ISOX and after a pre-incubation or not of 8 hours. Data are the mean  $\pm$  SD. AUC is the Area Under Curve. (C) Normalized area of cell aggregates in the presence or not of ISOX (5µM) after 2 hours and 4 hours of aggregation. Data are the mean  $\pm$  SD from six independent experiments. Control n=78 aggregates, ISOX n=80 aggregates. \*\*\*\*,  $P < 0.0001$  (Mann Whitney non-parametric test).
